# Supplementary material
Source: PubMed Central journal article supplement (PMC3382495)
Supplement: 1206721109_pnas.201206721SI.pdf [file 1206721109_pnas.201206721SI.pdf]

# Supporting Information

Jeraldo et al. 10.1073/pnas.1206721109

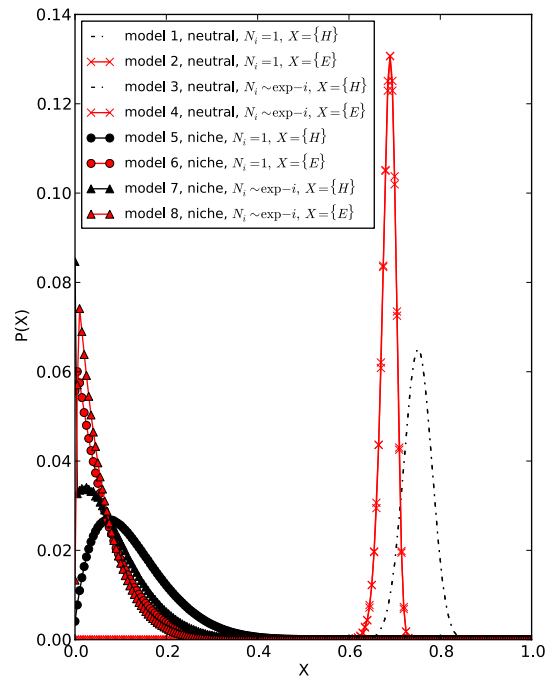

**Fig. S1.** Explicit numerical calculations of our metric on eight model systems. In these systems, we study the difference between the effects of the metric on neutral (models 1–4) and niche model systems (models 5–8). We also study the effect of choosing the closest distance (even-numbered models) compared with considering all distances (odd-numbered models). Finally, we consider the weighted models (models 3–4 and 7–8) vs. the unweighted ones (models 1–2 and 5–6).



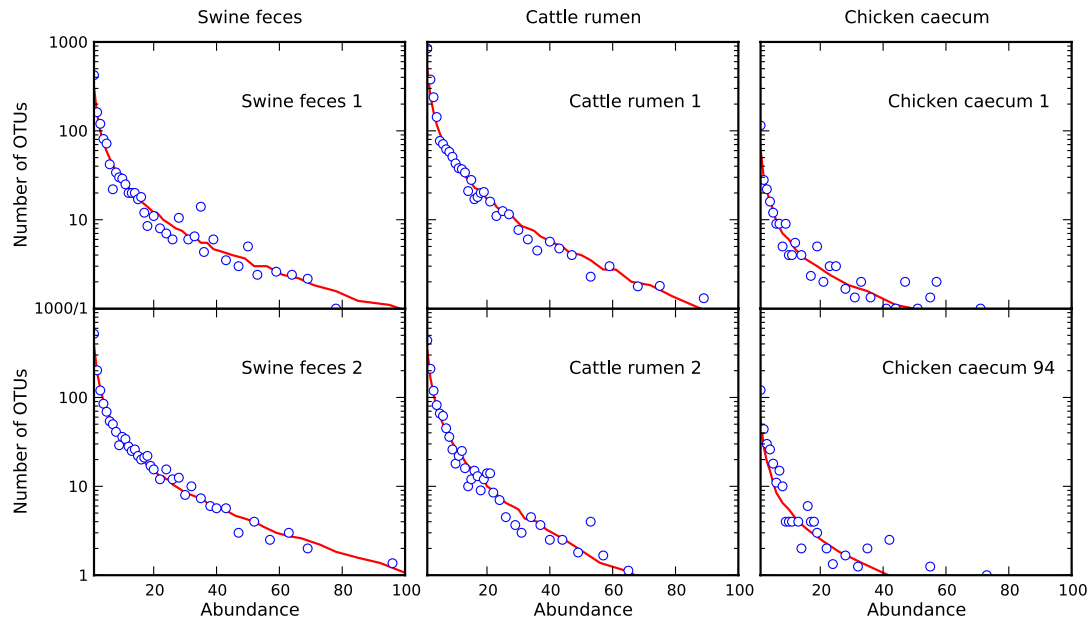

**Fig. S4.** Species abundance distribution for swine feces, cattle rumen, and chicken ceca. The species abundance distribution indicates the number of OTUs collected for each abundance.

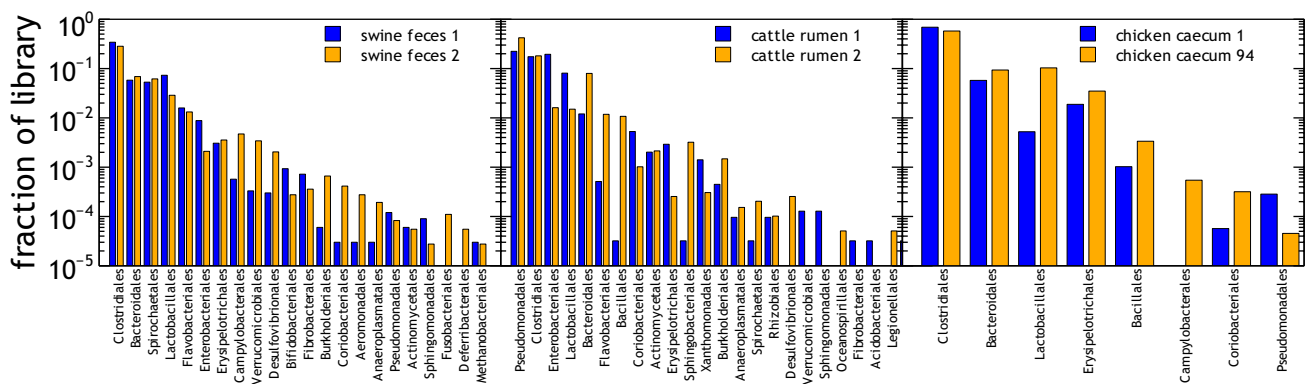

**Fig. S5.** Taxa comparisons. Taxonomic assignments at order level for all libraries, at 80% confidence threshold, sorted by combined abundance. Although there appear to be no differences in the form of the rank-abundance curves, we see differences in the taxonomic distributions here as a result of changes in diet or challenges to the microbial ecosystem.

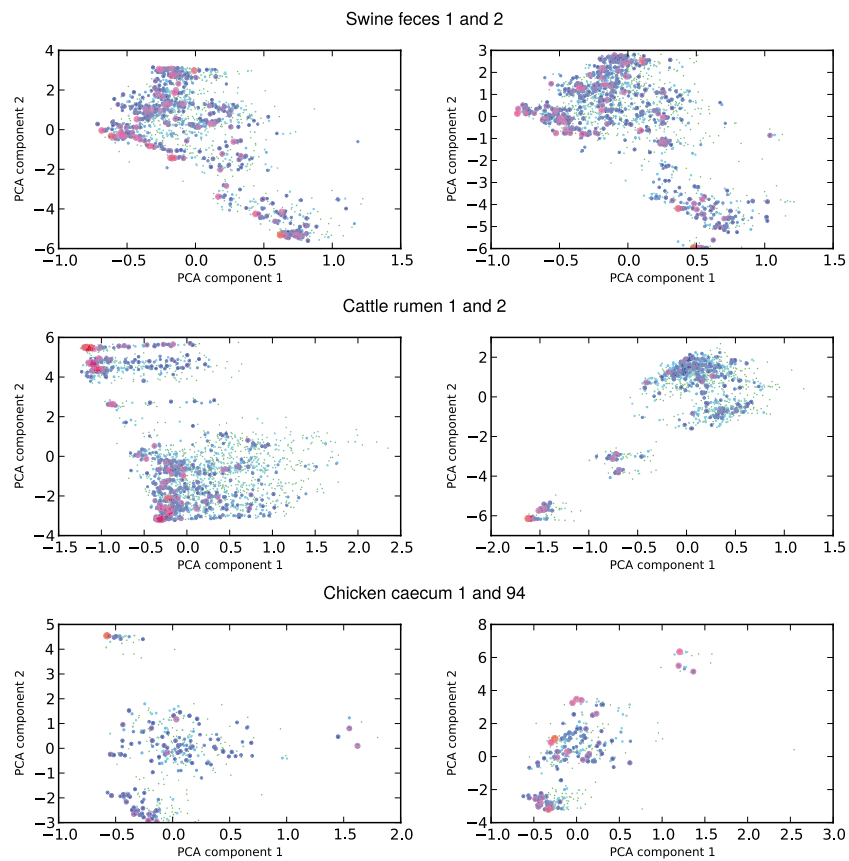

**Fig. S6.** Weighted PCA ordination applied to the six experimental datasets. Details on how weighted PCA was performed are provided in the main text. Each circle in this figure represents an OTU, and its size and color indicate the logarithm of OTU abundance.
